# Supplementary material for: Immigration rates and species niche characteristics affect the relationship between species richness and habitat heterogeneity in modeled meta-communities
Source: PeerJ journal article supplement (doi:10.7717/peerj.832), 2015-03-10
Supplement: Figure_S1.pdf [file Figure_S1.pdf]

Generate a random patchy landscape  
(number of patches, patch sizes, location,  
and  $E$  conditions)

landscape scale  
environmental  
heterogeneity

Calculate inter-patch immigration  
probabilities according to patch distance  
and a negative exponential dispersal kernel

Generate 250 species with random niche  
centers and identical niche breadth

Generate the meta-community by assigning  
individuals to patches according to their  
niche requirements

In each patch, kill 25% of the individuals

Determine the propagule pool for each  
patch, and the identities and abundances of  
establishing species in available sites

$T = T_{max}$ ?

landscape scale  
species richness

Results

No

Yes

Temporal dynamics
